# Supplementary material
Source: MDPI journal article supplement (https://www.mdpi.com/2073-4344/13/2/449)
Supplement: s1 [file s1]

## Supporting Information

### Synthesis of activated porous carbon from red dragon fruit peel waste for highly active catalytic reduction of toxic organic dyes

Pitchaimani Veerakumar,<sup>\*,1,2</sup> Shih-Tung Hung,<sup>2</sup> Pei-Qi Hung<sup>2</sup> and Veeraraghavan Vishnu Priya<sup>1</sup>

<sup>1</sup> Centre of Molecular Medicine and Diagnostics (COMManD), Department of Biochemistry, Saveetha Dental College and Hospitals, Saveetha Institute of Medical and Technical Sciences (SIMATS), Saveetha University, Chennai 600 077, India; [spveerakumar@gmail.com](mailto:spveerakumar@gmail.com); [vishnupriya@saveetha.com](mailto:vishnupriya@saveetha.com)

<sup>2</sup> Department of Chemistry, National Taiwan University, Taipei 10617, Taiwan; [spveerakumar@gmail.com](mailto:spveerakumar@gmail.com); [r09223109@ntu.edu.tw](mailto:r09223109@ntu.edu.tw); [peggyhung70@gmail.com](mailto:peggyhung70@gmail.com)

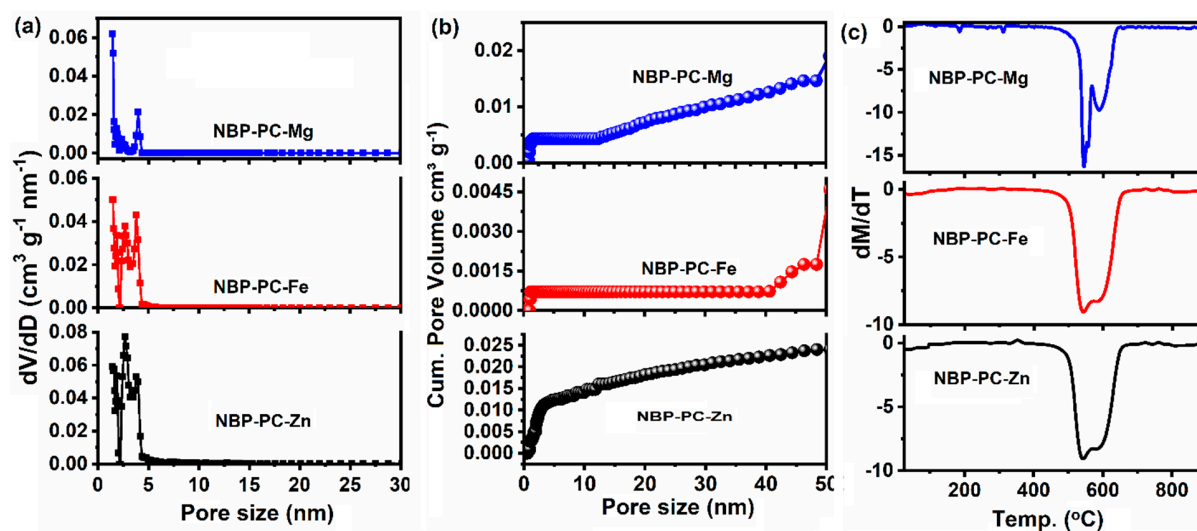

**Figure S1.** (a) Pore size distributions, (b) Pore size vs cumulative pore volume, and (c) DTA curves of NBP-PC-Mg, NBP-PC-Fe, and NBP-PC-Zn samples.

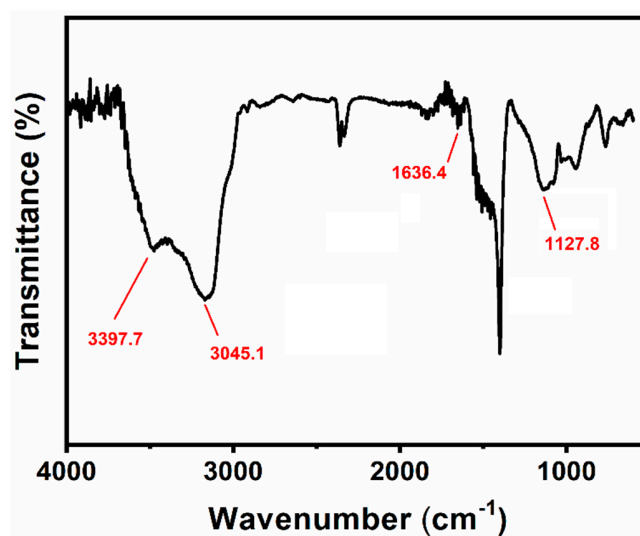

**Figure S2.** FT-IR spectrum of dry dragon fruit peels.

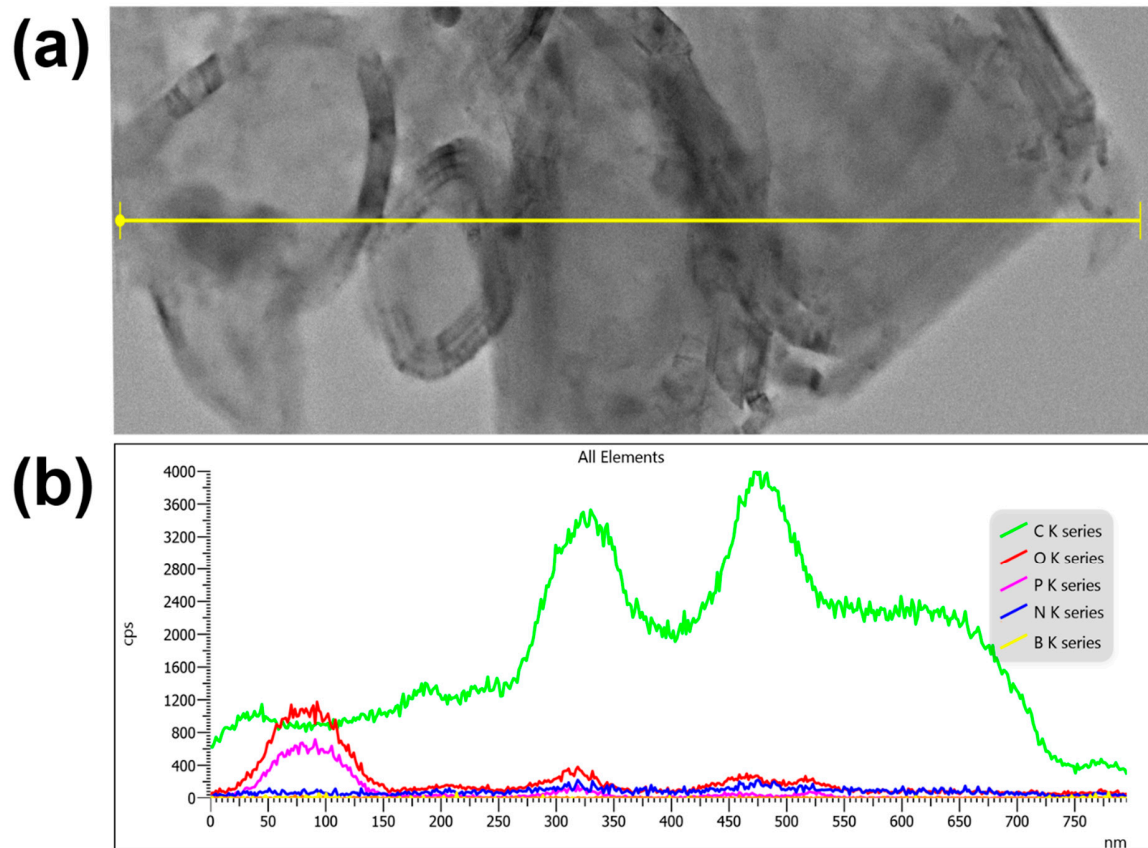

**Figure S3.** (a) The FE-TEM dark image indicating the EDS line scan position and (b) the spectrum of a representative elements.

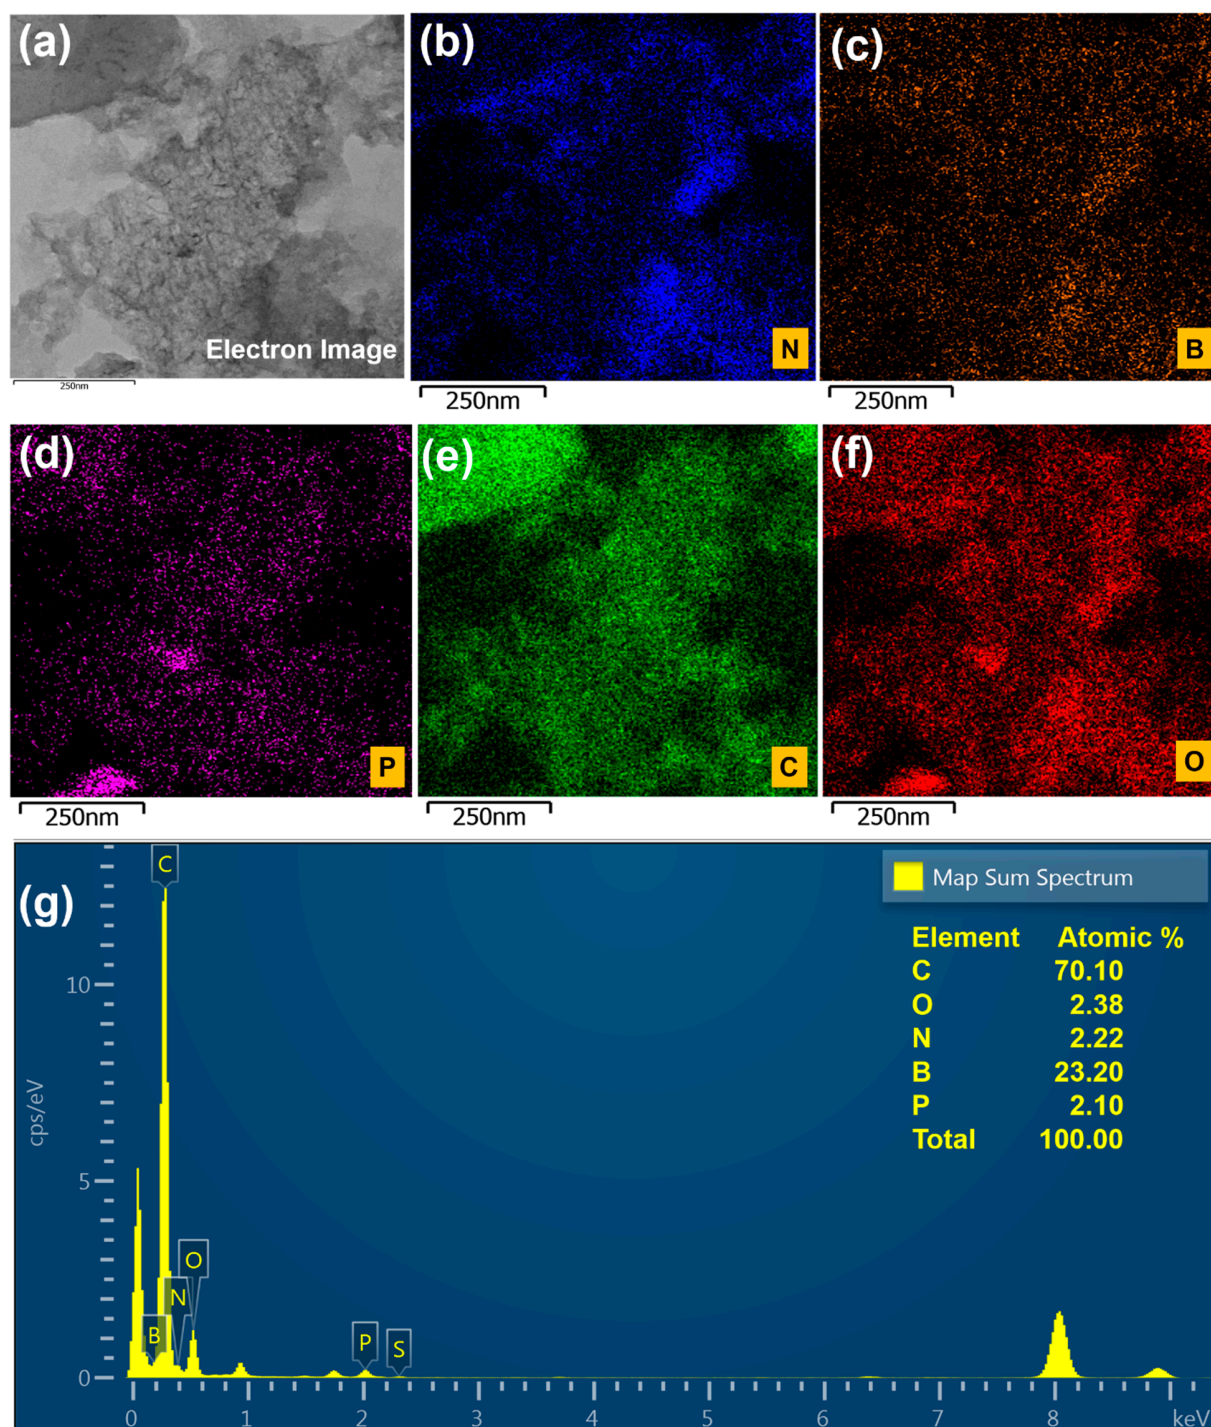

**Figure S4 .** (a) STEM image, (b–f) element mapping (N, B, P, C, and O elements), and (g) EDS results of NBP-PC-Mg sample.

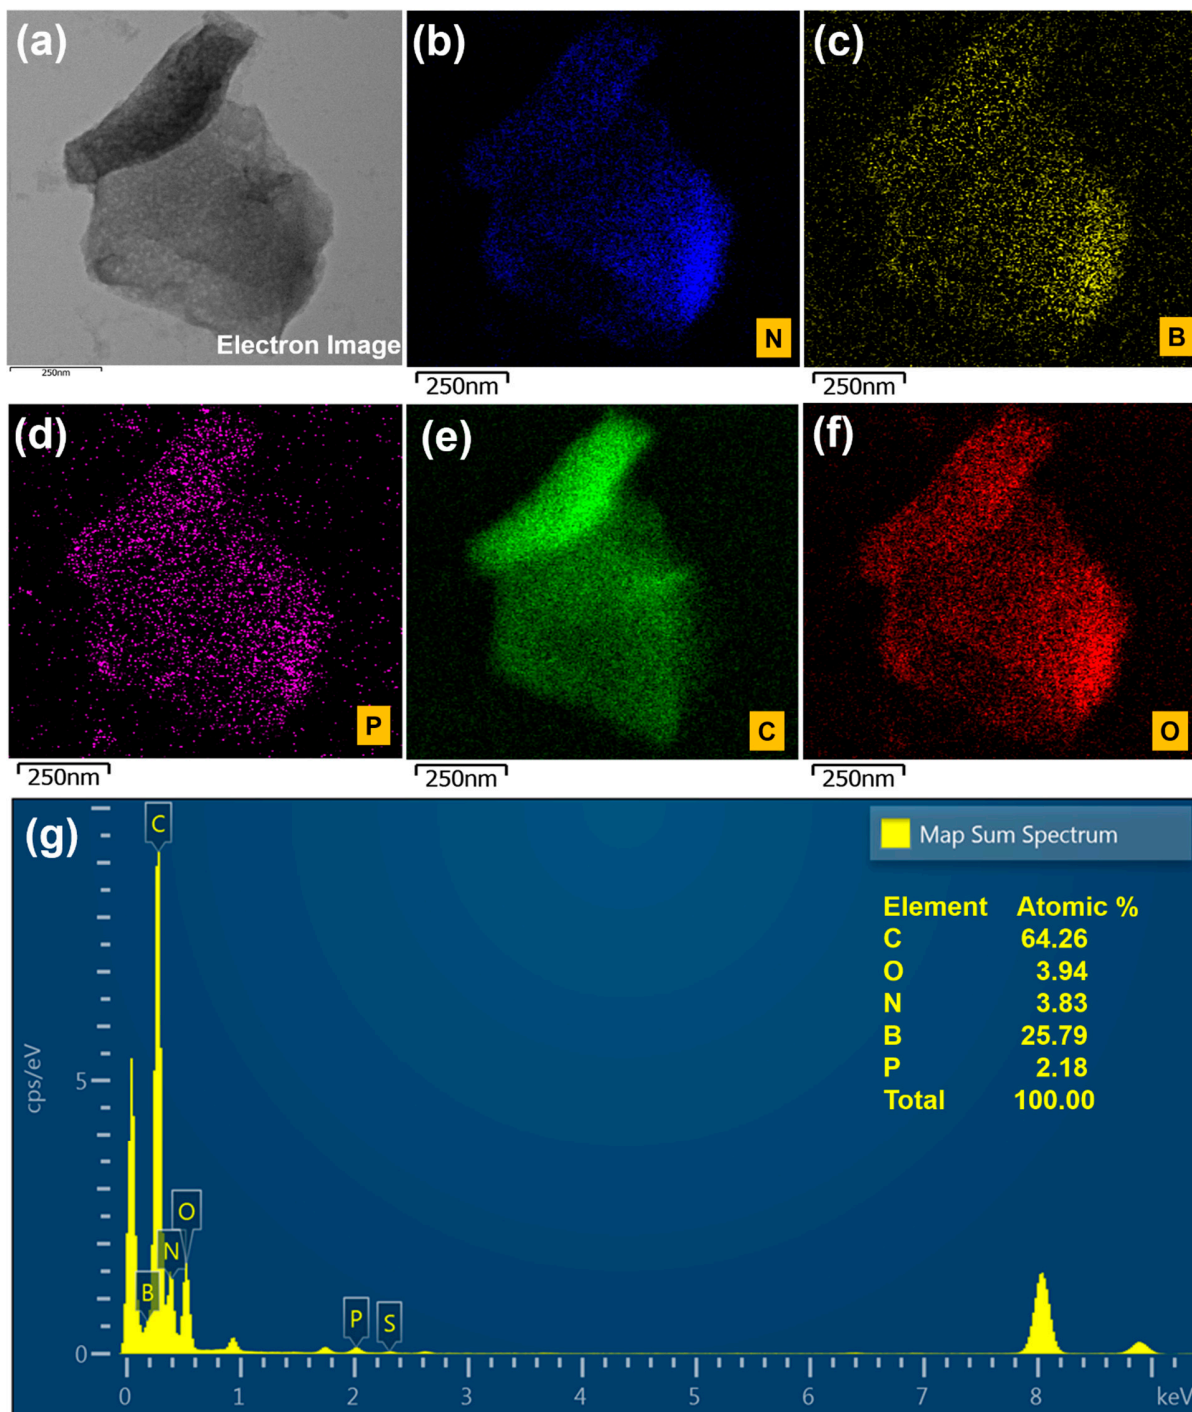

**Figure S5.** (a) STEM image, (b–f) element mapping (N, B, P, C, and O elements), and (g) EDS results of NBP-PC-Fe sample.



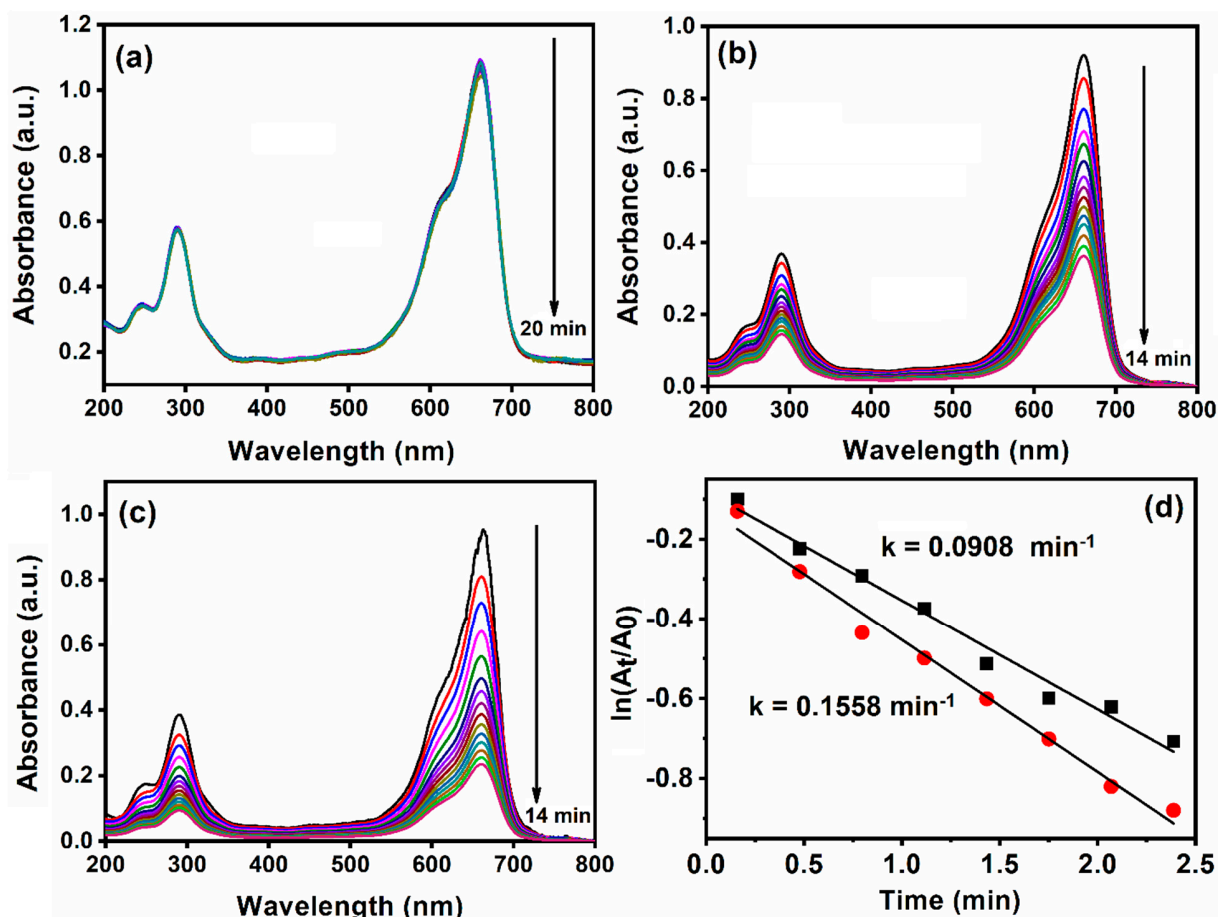

**Figure S6.** (a) Absence of NBP-PC-Zn catalyst, (b) presence of 0.2 mg, (c) presence of 0.4 mg of NBP-PC-Zn catalyst, and (b) the corresponding plot of  $\ln(A_t/A_0)$  vs. time.

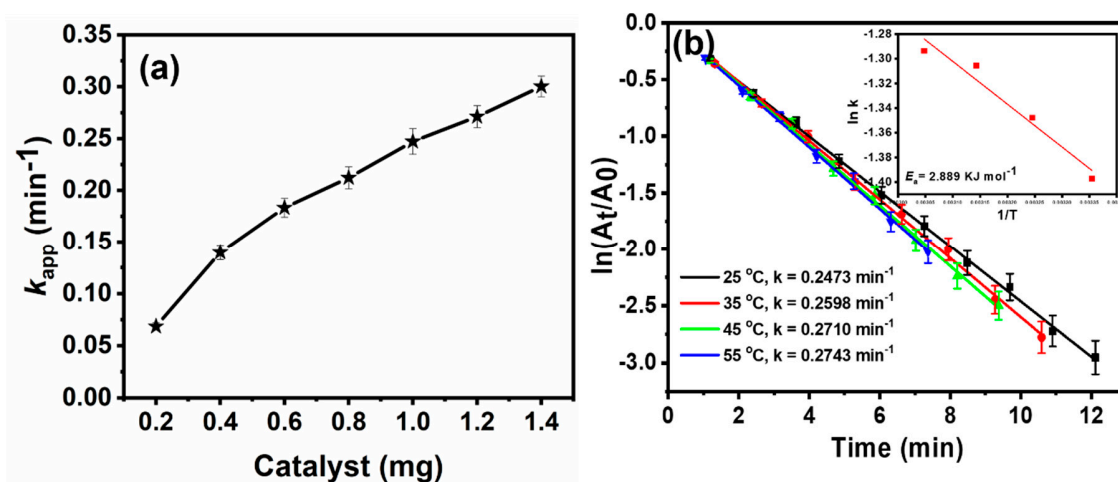

**Figure S7.** (a) The  $k_{app}$  for MB reduction of over different dosage of NBP-PC-Zn catalyst and (b) Kinetic curves of MB reduction expressed in the graph  $\ln(A_t/A_0)$  vs. time (Insert:  $\ln(k)$  vs.  $1/T$ ).

**Table S1.** Chemical and physical characteristics of the organic dyes

| Characteristics                | Value                                                                              | Value                                                                               | Value                                                                                |
|--------------------------------|------------------------------------------------------------------------------------|-------------------------------------------------------------------------------------|--------------------------------------------------------------------------------------|
| Dye name                       | MB                                                                                 | NB                                                                                  | CV                                                                                   |
| Wavelength ( $\lambda_{max}$ ) | 665                                                                                | 612                                                                                 | 586                                                                                  |
| Molecular weight               | 319.85                                                                             | 353.845                                                                             | 407.979                                                                              |
| Molecular formula              | $C_{16}H_{18}N_3SCl$                                                               | $C_{20}H_{20}N_3OCl$                                                                | $C_{25}N_3H_{30}Cl$                                                                  |
| Molecular structure            | 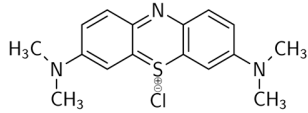 |  |  |

**Table S2.** Summary of XPS data obtained from fitting calculations for the B.E values of each component and their respective assignments.

|            | NBP-PC-Mg                     |                               |                 | NBP-PC-Fe       |                               |                               |                 | NBP-PC-Zn       |                               |                               |                 |                 |
|------------|-------------------------------|-------------------------------|-----------------|-----------------|-------------------------------|-------------------------------|-----------------|-----------------|-------------------------------|-------------------------------|-----------------|-----------------|
| assignment | B–C                           | BN/BC <sub>2</sub> O          | B–O             | B–C             | BN/BC <sub>2</sub> O          | <i>sp</i> <sup>2</sup> C–B–N  | B–O             | B–C             | BN/BC <sub>2</sub> O          | <i>sp</i> <sup>2</sup> C–B–N  | B–O             |                 |
| s          |                               |                               |                 |                 |                               |                               |                 |                 |                               |                               |                 |                 |
| B.E (eV)   | 190.9<br>± 0.02               | 191.8 ±<br>0.01               | 193.0<br>± 0.02 | 187.1 ±<br>0.01 | 189.4 ±<br>0.02               | 191.5 ±<br>0.02               | 193.5<br>± 0.02 | 187.1<br>± 0.01 | 189.0 ±<br>0.03               | 191.2 ±<br>0.02               | 193.1 ±<br>0.01 |                 |
| assignment | NBP-PC-Mg                     |                               |                 | NBP-PC-Fe       |                               |                               |                 | NBP-PC-Zn       |                               |                               |                 |                 |
| nmens      | pyridinic-N                   | pyridinic-N                   | pyrrolic-N      | pyridinic-N     | pyrrolic-N                    | pyridinic-N                   | pyrrolic-N      | quaternary-N    | N-oxide                       |                               |                 |                 |
| B.E (eV)   | 398.5<br>± 0.02               | 398.5<br>± 0.02               | 400.1<br>± 0.01 | 398.4<br>± 0.02 | 399.0 ± 0.01                  | 398.2<br>± 0.02               | 400.0<br>± 0.01 | 402.1<br>± 0.01 |                               | 402.9<br>± 0.01               |                 |                 |
| assignment | NBP-PC-Mg                     |                               |                 | NBP-PC-Fe       |                               |                               |                 | NBP-PC-Zn       |                               |                               |                 |                 |
| s          | C–P–O                         | C–P–O                         | C–P–O           | C–P–O           | C–P–O                         | C–P–O                         | C–P–O           | C–P–O           | C–P–O                         | C–P–O                         | C–P–O           |                 |
| B.E (eV)   | 133.5 ± 0.02                  | 134.4 ± 0.01                  |                 | 133.6 ± 0.03    | 134.5 ± 0.02                  |                               | 134.3 ± 0.02    |                 | 135.4 ± 0.01                  |                               |                 |                 |
| assignment | NBP-PC-Mg                     |                               |                 | NBP-PC-Fe       |                               |                               |                 | NBP-PC-Zn       |                               |                               |                 |                 |
| s          | <i>sp</i> <sup>2</sup><br>C=C | <i>sp</i> <sup>3</sup><br>C–C | C–N/<br>C=N     | O–C=O           | <i>sp</i> <sup>2</sup><br>C=C | <i>sp</i> <sup>3</sup><br>C–C | C–N/<br>C=N     | O–C=O           | <i>sp</i> <sup>2</sup><br>C=C | <i>sp</i> <sup>3</sup><br>C–C | C–N/<br>C=N     | O–C=O           |
| B.E (eV)   | 284.1<br>± 0.01               | 285.8 ±<br>0.02               | 287.3<br>± 0.03 | 290.2 ±<br>0.01 | 284.4 ±<br>0.01               | 285.7<br>± 0.02               | 289.0 ±<br>0.01 | 289.4 ±<br>0.02 | 285.0 ±<br>0.02               | 285.2 ±<br>0.03               | 286.8<br>± 0.01 | 289.1 ±<br>0.01 |
|            | NBP-PC-Mg                     |                               |                 | NBP-PC-Fe       |                               |                               |                 | NBP-PC-Zn       |                               |                               |                 |                 |



| assignment | C=O              | C=O              | C–O              | C=O              | C–O                 |
|------------|------------------|------------------|------------------|------------------|---------------------|
| s          |                  |                  |                  |                  |                     |
| B.E (eV)   | $529.9 \pm 0.01$ | $530.1 \pm 0.01$ | $533.5 \pm 0.01$ | $531.6 \pm 0.01$ | $533.0 \pm 0.02$ eV |
